# Supplementary material
Source: ML conference proceedings conference paper supplement (https://proceedings.neurips.cc/paper_files/paper/2011/hash/54a367d629152b720749e187b3eaa11b-Abstract.html)
Supplement: Supplementary file 1 [file 54a367d629152b720749e187b3eaa11b-Supplemental.zip]

## Supplementary materials to "Kernel Bayes' Rule"

### A Proof of Propositions 3 and 4

These propositions can be proved in a similar manner with simple linear algebra. We show the proofs for completeness.

*Proof of Proposition 3.* We show only the proof for  $C_{ZW}$ , as the case of  $C_{WW}$  is exactly the same. Let  $h = (\hat{C}_{XX} + \varepsilon_n I)^{-1} \hat{m}_{\Pi}^{(\ell)}$ , and decompose it as  $h = \sum_{i=1}^n \alpha_i k_{\mathcal{X}}(\cdot, X_i) + h_{\perp} = \alpha^T \mathbf{k}_{\mathcal{X}} + h_{\perp}$ , where  $h_{\perp}$  is orthogonal to all  $k_{\mathcal{X}}(\cdot, X_i)$ . Expansion of  $(\hat{C}_{XX} + \varepsilon_n I)h = \hat{m}_{\Pi}^{(\ell)}$  derives  $\frac{1}{n} \mathbf{k}_{\mathcal{X}}^T G_X \alpha + \varepsilon_n \mathbf{k}_{\mathcal{X}}^T \alpha + \varepsilon_n h_{\perp} = \hat{m}_{\Pi}^{(\ell)}$ . By taking the inner product with  $k_{\mathcal{X}}(\cdot, X_j)$ , we have

$$\left(\frac{1}{n} G_X + \varepsilon_n I_n\right) G_X \alpha = \hat{\mathbf{m}}_{\Pi}.$$

The coefficient  $\hat{\mu}$  in  $C_{ZW} = \hat{C}_{(YX)X} h = \sum_{i=1}^n \hat{\mu}_i k_{\mathcal{X}}(\cdot, X_i) \otimes k_{\mathcal{Y}}(\cdot, Y_i)$  is given by  $\hat{\mu} = G_X \alpha$ , and thus

$$\hat{\mu} = \left(\frac{1}{n} G_X + \varepsilon_n I_n\right)^{-1} \hat{\mathbf{m}}_{\Pi}.$$

□

*Proof of Proposition 4.* Let  $h = (\hat{C}_{WW}^2 + \delta_n I)^{-1} \hat{C}_{WW} k_{\mathcal{Y}}(\cdot, y)$ , and decompose it as  $h = \sum_{i=1}^n \alpha_i k_{\mathcal{Y}}(\cdot, Y_i) + h_{\perp} = \alpha^T \mathbf{k}_{\mathcal{Y}} + h_{\perp}$ , where  $h_{\perp}$  is orthogonal to all  $k_{\mathcal{Y}}(\cdot, Y_i)$ . Expansion of  $(\hat{C}_{WW}^2 + \delta_n I)h = \hat{C}_{WW} k_{\mathcal{Y}}(\cdot, y)$  derives  $\mathbf{k}_{\mathcal{Y}}^T (\Lambda G_Y)^2 \alpha + \delta_n \mathbf{k}_{\mathcal{Y}}^T \alpha + \delta_n h_{\perp} = \mathbf{k}_{\mathcal{Y}}^T \Lambda \mathbf{k}_{\mathcal{Y}}(y)$ . Taking the inner product with  $k_{\mathcal{Y}}(\cdot, Y_j)$  derives

$$((G_Y \Lambda)^2 + \delta_n I_n) G_Y \alpha = G_Y \Lambda \mathbf{k}_{\mathcal{Y}}(y).$$

The coefficient  $w$  in  $\hat{m}_{Q_{\mathcal{X}}|y} = \hat{C}_{ZW} h = \sum_{i=1}^n w_i k_{\mathcal{X}}(\cdot, X_i)$  is given by  $w = \Lambda G_Y \alpha$ , and thus

$$w = \Lambda ((G_Y \Lambda)^2 + \delta_n I_n)^{-1} G_Y \Lambda \mathbf{k}_{\mathcal{Y}}(y) = \Lambda G_Y ((\Lambda G_Y)^2 + \delta_n I_n)^{-1} \Lambda \mathbf{k}_{\mathcal{Y}}(y).$$

□

### B Derivation of the KBR update rule for nonparametric state-space model

This section gives a more detailed derivation of the update rule for nonparametric state-space model, which we sketched in Section 3.

Given the estimate of the kernel mean expression for  $p(x_t | \tilde{y}_1, \dots, \tilde{y}_t)$ , the forward filtering with

$$p(y_{t+1} | \tilde{y}_1, \dots, \tilde{y}_t) = \int p(y_{t+1} | x_{t+1}) \int p(x_{t+1} | x_t) p(x_t | \tilde{y}_1, \dots, \tilde{y}_t) dx_{t+1} dx_t$$

can be realized by the two-times applications of forward filtering procedure similar to Proposition 3. Namely, first the kernel mean of  $p(x_{t+1} | \tilde{y}_1, \dots, \tilde{y}_t) = \int p(x_{t+1} | x_t) p(x_t | \tilde{y}_1, \dots, \tilde{y}_t) dx_t$  can be estimated by

$$\hat{m}_{x_{t+1} | \tilde{y}_1, \dots, \tilde{y}_t} = \sum_{i=1}^T \beta_i k_{\mathcal{X}}(\cdot, X_{i+1}), \quad \text{where } \beta = \left(\frac{1}{T} G_X + \varepsilon_T I_T\right)^{-1} G_X \alpha.$$

In the same way, the second step is to compute the kernel mean of  $p(y_{t+1} | \tilde{y}_1, \dots, \tilde{y}_t) = \int p(y_{t+1} | x_{t+1}) p(x_{t+1} | \tilde{y}_1, \dots, \tilde{y}_t) dx_{t+1}$ , which is estimated by

$$\hat{m}_{y_{t+1} | \tilde{y}_1, \dots, \tilde{y}_t} = \sum_{i=1}^T \gamma_i k_{\mathcal{Y}}(\cdot, Y_i), \quad \text{where } \gamma = \left(\frac{1}{T} G_Y + \varepsilon_T I_T\right)^{-1} G_{X, X+1} \beta.$$

## C Rates of consistency

The proof idea for the consistency rates of the KBR estimators is essentially the same as [1, 3], in which the basic techniques are taken from the general theory of regularization [2].

First we give integral expression for the kernel mean and covariance operators. Recall that the kernel mean  $m_X$  of  $X$  on  $\mathcal{H}_X$  satisfies

$$\langle f, m_X \rangle = E[f(X)]$$

for any  $f \in \mathcal{H}_X$ . Plugging  $f = k_X(\cdot, u)$  into this relation derives

$$m_X(u) = E[k_X(u, X)] = \int k_X(u, \tilde{x}) dP_X(\tilde{x}), \quad (15)$$

which shows the explicit functional form of the kernel mean. In a similar manner, the explicit integral expression of the covariance operators  $C_{YX}$  and  $C_{XX}$  are given by

$$(C_{YX}f)(y) = \int k_Y(y, \tilde{y}) f(\tilde{x}) dP(\tilde{x}, \tilde{y}), \quad (C_{XX}f)(x) = \int k_X(x, \tilde{x}) f(\tilde{x}) dP_X(\tilde{x}), \quad (16)$$

respectively. The covariance operators are thus integral operators with integral kernel  $k_X$  or  $k_Y$ .

The first preliminary result is a rate of convergence for the mean transition in Theorem 2. In the following  $\mathcal{R}(C_{XX}^0)$  means  $\mathcal{H}_X$ .

**Theorem 6.** Assume that  $\pi/p_X \in \mathcal{R}(C_{XX}^\beta)$  for some  $\beta \geq 0$ , where  $\pi$  and  $p_X$  are the p.d.f. of  $\Pi$  and  $P_X$ , respectively. Let  $\hat{m}_\Pi^{(n)}$  be an estimator of  $m_\Pi$  such that  $\|\hat{m}_\Pi^{(n)} - m_\Pi\|_{\mathcal{H}_X} = O_p(n^{-\alpha})$  as  $n \rightarrow \infty$  for some  $0 < \alpha \leq 1/2$ . Then, with  $\varepsilon_n = n^{-\max\{\frac{2}{3}\alpha, \frac{\alpha}{1+\beta}\}}$ , we have

$$\|\hat{C}_{YX}^{(n)}(\hat{C}_{XX}^{(n)} + \varepsilon_n I)^{-1} \hat{m}_\Pi^{(n)} - m_{Q_Y}\|_{\mathcal{H}_Y} = O_p(n^{-\min\{\frac{2}{3}\alpha, \frac{2\beta+1}{2\beta+2}\alpha\}}), \quad (n \rightarrow \infty).$$

*Proof.* Take  $\eta \in \mathcal{H}_X$  such that  $\pi/p_X = C_{XX}^\beta \eta$ . Then, from Eqs. (15) and (16),

$$m_\Pi = \int k_X(\cdot, x) \frac{\pi(x)}{p_X(x)} p_X(x) d\mu_X(x) = C_{XX}^{\beta+1} \eta. \quad (17)$$

First we show the rate of the estimation error:

$$\|\hat{C}_{YX}^{(n)}(\hat{C}_{XX}^{(n)} + \varepsilon_n I)^{-1} \hat{m}_\Pi^{(n)} - C_{YX}(C_{XX} + \varepsilon_n I)^{-1} m_\Pi\|_{\mathcal{H}_Y} = O_p(n^{-\alpha} \varepsilon_n^{-1/2}), \quad (18)$$

as  $n \rightarrow \infty$ . By using the fact that  $B^{-1} - A^{-1} = B^{-1}(A - B)A^{-1}$  holds for any invertible operators  $A$  and  $B$ , the left hand side of Eq. (18) is upper bounded by

$$\begin{aligned} & \|\hat{C}_{YX}^{(n)}(\hat{C}_{XX}^{(n)} + \varepsilon_n I)^{-1}(\hat{m}_\Pi^{(n)} - m_\Pi)\|_{\mathcal{H}_Y} + \|(\hat{C}_{YX}^{(n)} - C_{YX})(C_{XX} + \varepsilon_n I)^{-1} m_\Pi\|_{\mathcal{H}_Y} \\ & + \|\hat{C}_{YX}^{(n)}(\hat{C}_{XX}^{(n)} + \varepsilon_n I)^{-1}(C_{XX} - \hat{C}_{XX}^{(n)})(C_{XX} + \varepsilon_n I)^{-1} m_\Pi\|_{\mathcal{H}_Y}. \end{aligned}$$

By the decomposition  $\hat{C}_{YX}^{(n)} = \hat{C}_{YY}^{(n)1/2} \hat{W}_{YX}^{(n)} \hat{C}_{XX}^{(n)1/2}$  with  $\|\hat{W}_{YX}^{(n)}\| \leq 1$  (see [2]), the first term is of  $O_p(n^{-\alpha} \varepsilon_n^{-1/2})$ . From Eq. (17), the second and third terms are of the order  $O_p(n^{-1/2})$  and  $O_p(n^{-1/2} \varepsilon_n^{-1/2})$ , respectively, by  $\|(C_{XX} + \varepsilon_n I)^{-1} C_{XX}\| \leq 1$ . This means Eq. (18).

Next, we show

$$\|C_{YX}(C_{XX} + \varepsilon_n I)^{-1} m_\Pi - m_{Q_Y}\|_{\mathcal{H}_Y} = O(\varepsilon_n^{\min\{(1+2\beta)/2, 1\}}) \quad (n \rightarrow \infty). \quad (19)$$

Let  $C_{YX} = C_{YY}^{1/2} W_{YX} C_{XX}^{1/2}$  be the decomposition with  $\|W_{YX}\| \leq 1$ . It follows from the relation

$$m_{Q_Y} = \int \int k(\cdot, y) \frac{\pi(x)}{p_X(x)} p(x, y) d\mu_X(x) d\mu_Y(y) = C_{YX} C_{XX}^\beta \eta$$

that the left hand side of Eq. (19) is upper bounded by

$$\|C_{YY}^{1/2} W_{YX}\| \|(C_{XX} + \varepsilon_n I)^{-1} C_{XX}^{(2\beta+3)/2} \eta - C_{XX}^{(2\beta+1)/2} \eta\|_{\mathcal{H}_X}.$$

By the eigendecomposition  $C_{XX} = \sum_i \lambda_i \phi_i \langle \phi_i, \cdot \rangle$ , where  $\{\phi_i\}$  are the unit eigenvectors and  $\{\lambda_i\}$  are the corresponding eigenvalues, the expansion

$$\|(C_{XX} + \varepsilon_n I)^{-1} C_{XX}^{(2\beta+3)/2} \eta - C_{XX}^{(2\beta+1)/2} \eta\|_{\mathcal{H}_X}^2 = \sum_i \left( \frac{\varepsilon_n \lambda_i^{(2\beta+1)/2}}{\lambda_i + \varepsilon_n} \right)^2 \langle \eta, \phi_i \rangle^2$$

holds. If  $0 \leq \beta < 1/2$ , we have  $\frac{\varepsilon_n \lambda_i^{(2\beta+1)/2}}{\lambda_i + \varepsilon_n} = \frac{\lambda_i^{(2\beta+1)/2}}{(\lambda_i + \varepsilon_n)^{(2\beta+1)/2}} \frac{\varepsilon_n^{(1-2\beta)/2}}{(\lambda_i + \varepsilon_n)^{(1-2\beta)/2}} \varepsilon_n^{(2\beta+1)/2} \leq \varepsilon_n^{(2\beta+1)/2}$ . If  $\beta \geq 1/2$ , then  $\frac{\varepsilon_n \lambda_i^{(2\beta+1)/2}}{\lambda_i + \varepsilon_n} \leq \|C_{XX}\| \varepsilon_n$ . The dominated convergence theorem shows that the above sum converges to zero as  $\varepsilon_n \rightarrow 0$  of the order  $O(\varepsilon_n^{\min\{2\beta+1, 2\}})$ .

From Eqs. (18) and (19), the optimal order of  $\varepsilon_n$  and the optimal rate of consistency are given as claimed.  $\square$

The following theorem shows the consistency rate of the estimator used in the conditioning step Eq. (8).

**Theorem 7.** Let  $f$  be a function in  $\mathcal{H}_X$ , and  $(Z, W)$  be a random variable taking value in  $\mathcal{X} \times \mathcal{Y}$ . Assume that  $E[f(Z)|W = \cdot] \in \mathcal{R}(C_{WW}^\nu)$  for some  $\nu \geq 0$ , and  $\hat{C}_{WZ}^{(n)} : \mathcal{H}_X \rightarrow \mathcal{H}_Y$  and  $\hat{C}_{WW}^{(n)} : \mathcal{H}_Y \rightarrow \mathcal{H}_Y$  be compact operators, which may not be positive definite, such that  $\|\hat{C}_{WZ}^{(n)} - C_{WZ}\| = O_p(n^{-\gamma})$  and  $\|\hat{C}_{WW}^{(n)} - C_{WW}\| = O_p(n^{-\gamma})$  for some  $\gamma > 0$ . Then, for  $\delta_n = n^{-\max\{\frac{4}{9}\gamma, \frac{4}{2\nu+5}\gamma\}}$  and any  $y \in \mathcal{Y}$ , we have as  $n \rightarrow \infty$

$$\|\hat{C}_{WW}^{(n)} ((\hat{C}_{WW}^{(n)})^2 + \delta_n I)^{-1} \hat{C}_{WZ}^{(n)} f - E[f(X)|W = \cdot]\|_{\mathcal{H}_X} = O_p(n^{-\min\{\frac{4}{9}\gamma, \frac{2\nu}{2\nu+5}\gamma\}}).$$

*Proof.* Let  $\eta \in \mathcal{H}_X$  such that  $E[f(Z)|W = \cdot] = C_{WW}^\nu \eta$ . First we show

$$\|\hat{C}_{WW}^{(n)} ((\hat{C}_{WW}^{(n)})^2 + \delta_n I)^{-1} \hat{C}_{WZ}^{(n)} f - C_{WW} (C_{WW}^2 + \delta_n I)^{-1} C_{WZ} f\|_{\mathcal{H}_X} = O_p(n^{-\gamma} \delta_n^{-5/4}). \quad (20)$$

The left hand side of Eq. (20) is upper bounded by

$$\begin{aligned} & \|\hat{C}_{WW}^{(n)} ((\hat{C}_{WW}^{(n)})^2 + \delta_n I)^{-1} (\hat{C}_{WZ}^{(n)} - C_{WZ}) f\|_{\mathcal{H}_Y} + \|(\hat{C}_{WW}^{(n)} - C_{WW}) (C_{WW}^2 + \delta_n I)^{-1} C_{WZ} f\|_{\mathcal{H}_Y} \\ & + \|\hat{C}_{WW}^{(n)} ((\hat{C}_{WW}^{(n)})^2 + \delta_n I)^{-1} ((\hat{C}_{WW}^{(n)})^2 - C_{WW}^2) (C_{WW}^2 + \delta_n I)^{-1} C_{WZ} f\|_{\mathcal{H}_Y}. \end{aligned}$$

Let  $\hat{C}_{WW}^{(n)} = \sum_i \lambda_i \phi_i \langle \phi_i, \cdot \rangle$  be the eigendecomposition, where  $\{\phi_i\}$  is the unit eigenvectors and  $\{\lambda_i\}$  is the corresponding eigenvalues. From  $|\lambda_i/(\lambda_i^2 + \delta_n)| = 1/|\lambda_i + \delta_n/\lambda_i| \leq 1/(2\sqrt{|\lambda_i|}\sqrt{\delta_n/|\lambda_i|}) = 1/(2\sqrt{\delta_n})$ , we have  $\|\hat{C}_{WW}^{(n)} ((\hat{C}_{WW}^{(n)})^2 + \delta_n I)^{-1}\| \leq 1/(2\sqrt{\delta_n})$ , and thus the first term of the above bound is of  $O_p(n^{-\gamma} \delta_n^{-1/2})$ . A similar argument by the eigendecomposition of  $C_{WW}$  combined with the decomposition  $C_{WZ} = C_{WW}^{1/2} U_{WZ} C_{ZZ}^{1/2}$  with  $\|U_{WZ}\| \leq 1$  shows that the second term is of  $O_p(n^{-\gamma} \delta_n^{-3/4})$ . From the fact  $\|(\hat{C}_{WW}^{(n)})^2 - C_{WW}^2\| \leq \|\hat{C}_{WW}^{(n)} (\hat{C}_{WW}^{(n)} - C_{WW})\| + \|(\hat{C}_{WW}^{(n)} - C_{WW}) C_{WW}\| = O_p(n^{-\gamma})$ , the third term is of  $O_p(n^{-\gamma} \delta_n^{-5/4})$ . This implies Eq. (20).

From  $E[f(Z)|W = \cdot] = C_{WW}^\nu \eta$  and  $C_{WZ} f = C_{WW} E[f(Z)|W = \cdot] = C_{WW}^{\nu+1} \eta$ , the convergence rate

$$\|C_{WW} (C_{WW}^2 + \delta_n I)^{-1} C_{WZ} f - E[f(Z)|W = \cdot]\|_{\mathcal{H}_Y} = O(\delta_n^{\min\{1, \frac{\nu}{2}\}}). \quad (21)$$

can be proved by the same way as Eq. (19).

Combination of Eqs.(20) and (21) proves the assertion.  $\square$

It is possible to extend the covariance operator  $C_{WW}$  to the one defined on  $L^2(Q_W)$  by

$$\tilde{C}_{WW} \phi = \int k_Y(y, w) \phi(w) dQ_W(w), \quad (\phi \in L^2(Q_W)). \quad (22)$$

The following theorem shows the consistency rate on average. Here  $\mathcal{R}(\tilde{C}_{WW}^0)$  means  $L^2(Q_W)$ .

**Theorem 8.** Let  $f$  be a function in  $\mathcal{H}_{\mathcal{X}}$ , and  $(Z, W)$  be a random variable taking values in  $\mathcal{X} \times \mathcal{Y}$  with distribution  $Q$ . Assume that  $E[f(Z)|W = \cdot] \in \mathcal{R}(\tilde{C}_{WW}^\nu) \cap \mathcal{H}_{\mathcal{Y}}$  for some  $\nu > 0$ , and  $\hat{C}_{WZ}^{(n)} : \mathcal{H}_{\mathcal{X}} \rightarrow \mathcal{H}_{\mathcal{Y}}$  and  $\hat{C}_{WW}^{(n)} : \mathcal{H}_{\mathcal{Y}} \rightarrow \mathcal{H}_{\mathcal{Y}}$  be compact operators, which may not be positive definite, such that  $\|\hat{C}_{WZ}^{(n)} - C_{WZ}\| = O_p(n^{-\gamma})$  and  $\|\hat{C}_{WW}^{(n)} - C_{WW}\| = O_p(n^{-\gamma})$  for some  $\gamma > 0$ . Then, for  $\delta_n = n^{-\max\{\frac{1}{2}\gamma, \frac{2}{\nu+2}\gamma\}}$ , we have as  $n \rightarrow \infty$

$$\|\hat{C}_{WW}^{(n)}((\hat{C}_{WW}^{(n)})^2 + \delta_n I)^{-1}\hat{C}_{WZ}^{(n)}f - E[f(Z)|W = \cdot]\|_{L^2(Q_W)} = O_p(n^{-\min\{\frac{1}{2}\gamma, \frac{\nu}{\nu+2}\gamma\}}),$$

where  $Q_W$  is the marginal distribution of  $W$ .

*Proof.* Note that for  $h, g \in \mathcal{H}_{\mathcal{Y}}$  we have  $(h, g)_{L^2(Q_W)} = E[h(W)g(W)] = \langle h, C_{WW}g \rangle_{\mathcal{H}_{\mathcal{Y}}}$ . It follows that the left hand side of the assertion is equal to

$$\|C_{WW}^{1/2}\hat{C}_{WW}^{(n)}((\hat{C}_{WW}^{(n)})^2 + \delta_n I)^{-1}\hat{C}_{WZ}^{(n)}f - C_{WW}^{1/2}E[f(Z)|W = \cdot]\|_{\mathcal{H}_{\mathcal{Y}}}.$$

First, by the similar argument to the proof of Eq. (20), it is easy to show that the rate of the estimation error is given by

$$\begin{aligned} \|C_{WW}^{1/2}\{\hat{C}_{WW}^{(n)}((\hat{C}_{WW}^{(n)})^2 + \delta_n I)^{-1}\hat{C}_{WZ}^{(n)}f - C_{WW}(C_{WW}^2 + \delta_n I)^{-1}C_{WZ}f\}\|_{\mathcal{H}_{\mathcal{Y}}} \\ = O_p(n^{-\gamma}\delta_n^{-1}). \end{aligned}$$

It suffices then to prove

$$\|C_{WW}(C_{WW}^2 + \delta_n I)^{-1}C_{WZ}f - E[f(Z)|W = \cdot]\|_{L^2(Q_W)} = O(\delta_n^{\min\{1, \frac{\nu}{2}\}}).$$

Let  $\xi \in L^2(Q_W)$  such that  $E[f(Z)|W = \cdot] = \tilde{C}_{WW}^\nu \xi$ . In a similar way to Theorem 1,  $\tilde{C}_{WW}E[f(Z)|W] = \tilde{C}_{WZ}f$  holds, where  $\tilde{C}_{WZ}$  is the extension of  $C_{WZ}$ , and thus  $C_{WZ}f = \tilde{C}_{WW}^{\nu+1}\xi$ . The left hand side of the above equation is equal to

$$\|\tilde{C}_{WW}(\tilde{C}_{WW}^2 + \delta_n I)^{-1}\tilde{C}_{WW}^{\nu+1}\xi - \tilde{C}_{WW}^\nu \xi\|_{L^2(Q_W)}.$$

By the eigendecomposition of  $\tilde{C}_{WW}$  in  $L^2(Q_W)$ , a similar argument to the proof of Eq. (21) shows the assertion.  $\square$

Combining the above theorems, we have the following consistency of KBR.

**Theorem 9.** Let  $f$  be a function in  $\mathcal{H}_{\mathcal{X}}$ ,  $(Z, W)$  be a random variable that has the distribution  $Q$  with p.d.f.  $p(y|x)\pi(x)$ , and  $\hat{m}_{\Pi}^{(n)}$  be an estimator of  $m_{\Pi}$  such that  $\|\hat{m}_{\Pi}^{(n)} - m_{\Pi}\|_{\mathcal{H}_{\mathcal{X}}} = O_p(n^{-\alpha})$  ( $n \rightarrow \infty$ ) for some  $0 < \alpha \leq 1/2$ . Assume that  $\pi/p_X \in \mathcal{R}(C_{XX}^\beta)$  with  $\beta \geq 0$ , and  $E[f(Z)|W = \cdot] \in \mathcal{R}(C_{WW}^\nu)$  for some  $\nu \geq 0$ . For the regularization constants  $\varepsilon_n = n^{-\max\{\frac{2}{3}\alpha, \frac{1}{1+\beta}\alpha\}}$  and  $\delta_n = n^{-\max\{\frac{4}{9}\gamma, \frac{4}{2\nu+5}\gamma\}}$ , where  $\gamma = \min\{\frac{2}{3}\alpha, \frac{2\beta+1}{2\beta+2}\alpha\}$ , we have for any  $y \in \mathcal{Y}$

$$\mathbf{f}_X^T R_{X|Y} \mathbf{k}_Y(y) - E[f(Z)|W = y] = O_p(n^{-\min\{\frac{4}{9}\gamma, \frac{2\nu}{2\nu+5}\gamma\}}), \quad (n \rightarrow \infty),$$

where  $\mathbf{f}_X^T R_{X|Y} \mathbf{k}_Y(y)$  is the estimator of  $E[f(Z)|W = y]$  given by Eq. (11).

*Proof.* By applying Theorem 6 to  $Y = (Y, X)$  and  $Y = (Y, Y)$ , we see that both of  $\|\hat{C}_{ZW}^{(n)} - C_{ZW}\|$  and  $\|\hat{C}_{WW}^{(n)} - C_{WW}\|$  are of  $O_p(n^{-\gamma})$ . Since

$$\begin{aligned} \mathbf{f}_X^T R_{X|Y} \mathbf{k}_Y(y) - E[f(Z)|W = y] \\ = \langle k_Y(\cdot, y), \hat{C}_{WW}^{(n)}((\hat{C}_{YY}^{(n)})^2 + \delta_n I)^{-1}\hat{C}_{WZ}^{(n)}f - E[f(Z)|W = \cdot] \rangle_{\mathcal{H}_{\mathcal{Y}}}, \end{aligned}$$

combination of Theorems 6 and 7 proves the theorem.  $\square$

The next theorem shows the rate on average w.r.t.  $Q_W$ . The proof is similar to the above theorem, and omitted.

**Theorem 10.** Let  $f$  be a function in  $\mathcal{H}_{\mathcal{X}}$ ,  $(Z, W)$  be a random variable that has the distribution  $Q$  with p.d.f.  $p(y|x)\pi(x)$ , and  $\hat{m}_{\Pi}^{(n)}$  be an estimator of  $m_{\Pi}$  such that  $\|\hat{m}_{\Pi}^{(n)} - m_{\Pi}\|_{\mathcal{H}_{\mathcal{X}}} = O_p(n^{-\alpha})$  ( $n \rightarrow \infty$ ) for some  $0 < \alpha \leq 1/2$ . Assume that  $\pi/p_X \in \mathcal{R}(C_{XX}^{\beta})$  with  $\beta \geq 0$ , and  $E[f(Z)|W = \cdot] \in \mathcal{R}(\tilde{C}_{WW}^{\nu}) \cap \mathcal{H}_{\mathcal{Y}}$  for some  $\nu > 0$ . For the regularization constants  $\varepsilon_n = n^{-\max\{\frac{2}{3}\alpha, \frac{1}{1+\beta}\alpha\}}$  and  $\delta_n = n^{-\max\{\frac{1}{2}\gamma, \frac{2}{\nu+2}\gamma\}}$ , where  $\gamma = \min\{\frac{2}{3}\alpha, \frac{2\beta+1}{2\beta+2}\alpha\}$ , we have

$$\|\mathbf{f}_X^T R_{X|Y} \mathbf{k}_Y(W) - E[f(Z)|W]\|_{L^2(Q_W)} = O_p(n^{-\min\{\frac{1}{2}\gamma, \frac{\nu}{\nu+2}\gamma\}}), \quad (n \rightarrow \infty).$$

We have also the consistency of estimator for the kernel mean of posterior, if we make stronger assumptions. First, we formulate the mean of the conditional probability  $q(x|y)$  in terms of operators. Let  $(Z, W)$  be a random variable with distribution  $Q$ . Assume that for any  $f \in \mathcal{H}_{\mathcal{X}}$  the conditional mean  $E[f(Z)|W = \cdot]$  is included in  $\mathcal{H}_{\mathcal{Y}}$ . We have a linear operator  $S$  defined by

$$S : \mathcal{H}_{\mathcal{X}} \rightarrow \mathcal{H}_{\mathcal{Y}}, \quad f \mapsto E[f(Z)|W = \cdot].$$

If we further assume that  $S$  is bounded, the adjoint operator  $S^* : \mathcal{H}_{\mathcal{Y}} \rightarrow \mathcal{H}_{\mathcal{X}}$  satisfies

$$\langle S^* k_Y(\cdot, y), f \rangle_{\mathcal{H}_{\mathcal{X}}} = \langle k_Y(\cdot, y), Sf \rangle_{\mathcal{H}_{\mathcal{Y}}} = E[f(Z)|W = y]$$

for any  $y \in \mathcal{Y}$ , and thus  $S^* k_Y(\cdot, y)$  is equal to the kernel mean of conditional probability distribution of  $Z$  given  $W = y$ .

We make the following further assumptions:

**Assumption (S)**

1. The canonical map  $A_W : \mathcal{H}_{\mathcal{Y}} \rightarrow L^2(Q_W)$  is injective, that is,  $C_{WW}$  is injective.
2. There exists  $\nu > 0$  such that for any  $f \in \mathcal{H}_{\mathcal{X}}$  there is  $\eta_f \in \mathcal{H}_{\mathcal{X}}$  with  $Sf = C_{WW}^{\nu} \eta_f$ , and the linear map

$$C_{WW}^{-\nu} S : \mathcal{H}_{\mathcal{X}} \rightarrow \mathcal{H}_{\mathcal{Y}}, \quad f \mapsto \eta_f$$

is bounded.

**Theorem 11.** Let  $(Z, W)$  be a random variable that has the distribution  $Q$  with p.d.f.  $p(y|x)\pi(x)$ , and  $\hat{m}_{\Pi}^{(n)}$  be an estimator of  $m_{\Pi}$  such that  $\|\hat{m}_{\Pi}^{(n)} - m_{\Pi}\|_{\mathcal{H}_{\mathcal{X}}} = O_p(n^{-\alpha})$  ( $n \rightarrow \infty$ ) for some  $0 < \alpha \leq 1/2$ . Assume (S) above, and  $\pi/p_X \in \mathcal{R}(C_{XX}^{\beta})$  with some  $\beta \geq 0$ . For the regularization constants  $\varepsilon_n = n^{-\max\{\frac{2}{3}\alpha, \frac{1}{1+\beta}\alpha\}}$  and  $\delta_n = n^{-\max\{\frac{4}{9}\gamma, \frac{4}{2\nu+5}\gamma\}}$ , where  $\gamma = \min\{\frac{2}{3}\alpha, \frac{2\beta+1}{2\beta+2}\alpha\}$ , we have

$$\|\mathbf{k}_X^T R_{X|Y} \mathbf{k}_Y(y) - m_{Q_{X|Y}}\|_{\mathcal{H}_{\mathcal{X}}} = O_p(n^{-\min\{\frac{4}{9}\gamma, \frac{2\nu}{2\nu+5}\gamma\}}),$$

as  $n \rightarrow \infty$ , where  $m_{Q_{X|Y}}$  is the kernel mean of the posterior given  $y$ .

*Proof.* First, in a similar manner to the proof of Eq. (20), we have

$$\begin{aligned} \|\hat{C}_{ZW}^{(n)} ((\hat{C}_{WW}^{(n)})^2 + \delta_n I)^{-1} \hat{C}_{WW}^{(n)} k_Y(\cdot, y) - C_{ZW} (C_{WW}^2 + \delta_n I)^{-1} C_{WW} k_Y(\cdot, y)\|_{\mathcal{H}_{\mathcal{X}}} \\ = O_p(n^{-\gamma} \delta_n^{-5/4}). \end{aligned}$$

The assertion is thus obtained if

$$\|C_{ZW} (C_{WW}^2 + \delta_n I)^{-1} C_{WW} k_Y(\cdot, y) - S^* k_Y(\cdot, y)\|_{\mathcal{H}_{\mathcal{X}}} = O(\delta_n^{\min\{1, \frac{\nu}{2}\}}) \quad (23)$$

is proved. The left hand side of Eq. (23) is upper-bounded by

$$\begin{aligned} \|C_{ZW} (C_{WW}^2 + \delta_n I)^{-1} C_{WW} - S^*\| \|k_Y(\cdot, y)\|_{\mathcal{H}_{\mathcal{Y}}} \\ = \|C_{WW} (C_{WW}^2 + \delta_n I)^{-1} C_{WZ} - S\| \|k_Y(\cdot, y)\|_{\mathcal{H}_{\mathcal{Y}}}. \end{aligned}$$

It follows from Theorem 1 that  $C_{WZ} = C_{WW} S$ , and thus  $\|C_{WW} (C_{WW}^2 + \delta_n I)^{-1} C_{WZ} - S\| = \|C_{WW} (C_{WW}^2 + \delta_n I)^{-1} C_{WW} S - S\| \leq \delta_n \|(C_{WW}^2 + \delta_n I)^{-1} C_{WW}^{\nu}\| \|C_{WW}^{-\nu} S\|$ . The eigendecomposition of  $C_{WW}$  together with the inequality  $\frac{\delta_n \lambda^{\nu}}{\lambda^2 + \delta_n} \leq \delta_n^{\min\{1, \nu/2\}}$  ( $\lambda \geq 0$ ) completes the proof.  $\square$

## References

- [1] A. Caponnetto and E. De Vito. Optimal rates for regularized least-squares algorithm. *Foundations of Computational Mathematics*, 7(3):331–368, 2007.
- [2] H.W. Engl, M. Hanke, and A. Neubauer. *Regularization of Inverse Problems*. Kluwer Academic Publishers, 2000.
- [3] S. Smale and D.-X. Zhou. Learning theory estimates via integral operators and their approximation. *Constructive Approximation*, 26:153–172, 2007.
